# Supplementary material
Source: PubMed Central journal article supplement (PMC7492858)
Supplement: mmc1.pdf [file mmc1.pdf]

# Fuzzy Logic based Adaptable Design and Programming of Medical Products for the COVID- 19 Anti-epidemi

*by* NoNo

---

|                |                                                     |                 |       |
|----------------|-----------------------------------------------------|-----------------|-------|
| FILE           | D_WEBSOFT_WEB_FILES_E2C7151AE821DA0D.DOCX (602.71K) |                 |       |
| TIME SUBMITTED | 09-AUG-2020 04:16PM (UTC+0930)                      | WORD COUNT      | 9241  |
| SUBMISSION ID  | 1367485899                                          | CHARACTER COUNT | 48197 |

# Fuzzy Logic based Adaptable Design and Programming of Medical Products for the COVID-19 Anti-epidemic Normalization

You-lei Fu <sup>1,2,\*</sup>, Kuei-chia Liang <sup>1</sup>

<sup>1</sup> Department of Design, National Taiwan Normal University, Taipei 106, Taiwan; fuyouleifury@gmail.com (Y.F.); kcliang1999@gmail.com

<sup>2</sup> Fine Art and Design College, Quanzhou Normal University, Quanzhou 362000, China;

\* Correspondence: You-lei Fu, fuyouleifury@gmail.com.

## Abstract

**Background:** The normalization of COVID-19 prevention and control constantly affects lives worldwide. In this study, the protective, purifying and barrier functions of residential vestibules were discussed. Considering the household anti-epidemic status, economic and environmental benefits, the fuzzy logic based adaptable design of anti-epidemic products in the vestibule was proposed.

**Method:** Firstly, common Medical product types used in vestibules and household anti-epidemic products were identified through the literature review, focus groups and questionnaires, and a Target Adaptable Set was aggregated for functional configuration decomposition and matching calculations. Secondly, through the focus group approach, paired comparative probability matrix technique was combined with fuzzy theory to obtain probability values of product function usage. Finally, the adaptability measure formula was applied to obtain the adaptability factor and adaptability of the Product Function.

**Results:** Our results show that the highest the Adaptability value of the Disinfectant sprays, the more it can be prioritized for design development with functional cost savings, simplification or clustering.

**Conclusion:** The data results in this study can guide the adaptable design and programming of the vestibule anti-epidemic products. The higher Adaptability value of a Product Function indicates that it is more capable of being simplified, clustered, and adapting to changes in the Target Adaptable set.

**Keywords:** Anti-epidemic normalization; Vestibule products; Adaptable design; Fuzzy theory; Computational design analysis

## 1. Introduction

Since 2019, coronavirus (COVID-19) has spread to many countries [ [1] - [3] ]. During the COVID-19 epidemic, "social distancing measures" is still recognized as the most effective approach [ [4] - [8] ] in the absence of any vaccine or treatment. Considering the epidemic situation, "home quarantine" was recommended as a preventive measure to protect both oneself and others by physically isolating the infected from communities and preventing second- and third-generation cases development [ [9] ]. "Self-quarantine" was originally proposed, namely COVID-19 infected individuals were prevented from contacting with others; eventually it evolved to that all public "stays at home" for quarantine as much as possible to prevent epidemic spread, regardless of a person with or without infected symptoms of COVID-19 [ [10] ].

Since 2020, the number of confirmed COVID-19 cases in China has been on a downward trend. The government has begun to coordinate epidemic prevention and control with economic social development efforts. China began to fully promote work and production resumption under the anti-epidemic normalization. The concept of "new normalization" is introduced and discussed by numerous social media posts, online newspapers, portals and forums, and academic platforms [ [11] ]. The "normalization" concept will eventually become a stable reality and normality state, influencing the future lives and work of the public. However, due to the sudden outbreak of the COVID-19 epidemic, the preparation in the households is not adequately made for home self-quarantine and residential spaces are not designed for epidemic prevention factors. As a result, anti-epidemic supplies are temporarily placed in specific locations in the house during the epidemic period; there is a lack of standard design patterns for placement and usage due to different types and conditions of residential spaces. Under the "COVID-19 anti-epidemic normalization" concept, the placement and usage of household anti-epidemic items need to be improved from the perspective of the long-term usage. As a connecting area with outdoor, the vestibule is an important separating part from outdoor with protective and purifying characteristics. In this study, the residential vestibule space is used as an important area for home epidemic prevention, and a design and development method is proposed, in which general household anti-epidemic products are combined with common products used in residential vestibules. Finally, epidemic prevention functions are integrated into houses to extend the usage time and application of anti-epidemic products. Besides, an improved adaptable design methodology is used for the design development of household anti-epidemic products at vestibules.

## 2. Literature Review

### 2.1 Fuzzy Theory

Many decision-making methods, such as the Analytic Hierarchy Process (AHP), Elimination Et Choice Translating Reality (ELECTRE) and Borda count method, are based on paired comparative judgment matrix. In other words, these methods greatly rely on the decision maker's intuitive judgment to evaluate things that cannot be physically measured. With the decision maker's relevant knowledge and experience, the real situation could be reflected [ [12] - [14] ]. Since the usage probability of product functions is influenced by lifestyle and culture, there is randomness and fuzziness in PF usage. Therefore, in this study, the paired comparison judgment matrix technique in the usage decision-making method is proposed and combined with fuzzy theory to obtain the usage probability value of PF through expert evaluation.

### 2.1.1 Linguistic Variable

Linguistic Variable takes words in the natural language as values, providing appropriate subjective judgment expressions. Linguistic Variable is used to process complex, unclear or ambiguous information to express the computable "Possibility" [ [15] ]. Since subjective expressions have a considerable degree of ambiguity, the fuzzy logical concept can be employed to describe the usage probability of product functions. Van Laarhoven and Pedrycz applied the fuzzy concept to paired comparison matrix to deal with subjectivity, inaccuracy and ambiguity in decision-makers' judgments [ [16] ]. Buckley used ladder fuzzy numbers transforming expert opinions into a fuzzy matrix [ [17] ]. Zimmerman proposed a classical set of "probabilistic" linguistic variables examples based on Zadeh's fuzzy logic and fuzzy probability, such as: {Almost impossible, Not very probable, Very probable, Almost certain} [ [18] ]. Halliwell proposed a linguistic Bayesian network method to measure the linguistic probability and fuzzy numbers, such as: {Impossible, Very unlikely, Nearly impossible, Quite unlikely, Even chance, Very likely, Quite likely, Nearly certain, Certain} [ [19] ]. Lower et al. proposed the probability affiliation function of the semantic variable for event occurrence and the use of degree adjective language expressions, like : {Extremely improbable, Very rare, Average, Probable, Frequent} [ [20] ], allowing assessors to use semantic vocabulary to judge the probability occurrence degree.

### 2.1.2 Trapezoidal Membership Functions

In this study, the probability of product function (PF) usage is determined, the fuzzy set corresponding to the semantic variable is denoted using trapezoidal membership functions [ [17] , [20] ] with parameters (a, b, c, d). As shown in Figure 1, the positive trapezoidal fuzzy number is defined as  $\tilde{N}$ , and  $\tilde{N} = (a, b, c, d)$ , and its membership function [ [21] ] is defined by the following formula:

$$\mu_{\tilde{N}}(x) = \begin{cases} 0, & (x \leq a) \\ \frac{x-a}{a-b}, & (a < x \leq b) \\ 1, & (b < x \leq c) \\ \frac{x-d}{c-d}, & (c < x \leq d) \\ 0, & (x > d) \end{cases} \quad (1)$$

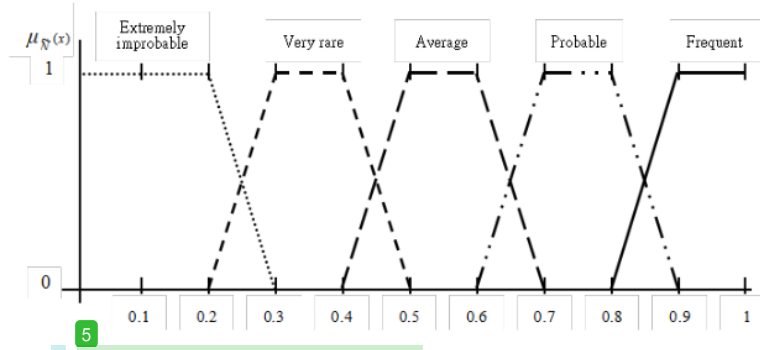

**Figure 1.** Linguistic variable Probability in logarithmic form.

According to the nature of trapezoidal membership functions and the expansion principle [ [18] , [22] ], it is assumed that there are two trapezoidal fuzzy numbers  $\tilde{N}_1 = (a_1, b_1, c_1, d_1)$  and  $\tilde{N}_2 = (a_2, b_2, c_2, d_2)$ , which are calculated as follows:

$$\tilde{N}_1 \oplus \tilde{N}_2 = (a_1 + a_2, b_1 + b_2, c_1 + c_2, d_1 + d_2) \quad (2)$$

$$\tilde{N}_1 \otimes \tilde{N}_2 = (a_1 \times a_2, b_1 \times b_2, c_1 \times c_2, d_1 \times d_2) \quad (3)$$

The semantic variables and trapezoidal fuzzy numbers used in this study are shown in Table 1:

**Table 1.** Linguistic Variable and Trapezoidal Fuzzy Number.

|                | Linguistic Variable  | Trapezoidal Fuzzy Numbers |
|----------------|----------------------|---------------------------|
| L <sub>1</sub> | Extremely improbable | 0,0,0.2,0.3               |
| L <sub>2</sub> | Very rare            | 0.2,0.3,0.4,0.5           |
| L <sub>3</sub> | Average              | 0.4,0.5,0.6,0.7           |
| L <sub>4</sub> | probable             | 0.6,0.7,0.8,0.9           |
| L <sub>5</sub> | Frequent             | 0.8,0.9,1.0,1.0           |

### 2.1.3 Defuzzification Method

The process of converting fuzzy numbers to clear values is called "Defuzzification". From the overall perspective of a positive trapezoidal fuzzy number, the central part is the region expressing the best importance [ [23] ], and the fuzzy assessment value  $\tilde{R}_{ij} = (a_{ij}, b_{ij}, c_{ij}, d_{ij})$  can be defuzzified (In terms of  $R_{\tilde{N}_{ij}}$ ) by the center-value method formula as follows:

$$R_{\tilde{N}_{ij}} = \frac{(b_{ij} + c_{ij})}{2} + \frac{[(d_{ij} - c_{ij}) - (b_{ij} - a_{ij})]}{2} = \frac{a_{ij} + 2b_{ij} + 2c_{ij} + d_{ij}}{6} \quad (4)$$

## 2.2 Household Anti-epidemic Products Recommendation

Home self-quarantine behaviors can effectively delay virus transmission [ [24] - [25] ]. Although COVID-19 transmission risk between individuals is much greater than that through surfaces, using cleaning products such as disinfectant wipes or disinfectant sprays to clean and disinfect high-frequency contacted surfaces at least once every day (even if you do not go outdoors) is recommended by the Center for Disease Control and Prevention (CDC) [ [26] ]. The recommendations of anti-epidemic products proposed by World Health Organization's (WHO) are as follows: (1) clean hands regularly and thoroughly with alcohol-based hand sanitizer, or wash hands with soap and water; (2) avoid contact with eyes, nose and mouth; (3) ensure that you and people around you maintain good respiratory hygiene; (4) seek medical attention if you suffer from any fever, cough, and difficulty breathing, call in advance if possible and follow the instructions of local health authorities. Household anti-epidemic products [ [9] ] include thermometers, disposable medical masks, medical-surgical masks or N95/KN95 masks, and household disinfection products, etc.

## 2.3 Residential Vestibule

In practice, residential space usage is defined by resident preferences [ [27] ]. It is not just a structure but a space created for a set of complex purposes [ [28] ]. With the change of cultural values and practices, the psychological needs and the residential function are changing [ [29] ]. Abercrombie believes that an architecture entrance is both a physical and psychological turning point, which brings out people's memory of indoor and outdoor environment here, and the psychological expectations based on this memory [ [30] ]. The East Asian traditional residential entrance is a transitional area between indoor and outdoor, generally known as the vestibule in China [ [31] ], "Genkan" in Japan, and "Hyun-gwan" in Korea [ [32] ]. After the introduction of Western architectural forms into China in the 19th century, vestibule space in modern Chinese houses remains the progressive concept of barrier and protection. Besides, influenced by Japanese Genkan the additional purifying function, vestibule functions that blend Eastern and Western living styles are gradually developed.



## 2.4 Adaptable Design

Adaptable design is a design model that balances economic and environmental benefits. The basic idea of adaptable design is to design products with adaptability to meet new demands, or to reuse products and designs as the environment changes, and adaptability is defined as an extension of the product's utility (service) [ [33] ]. The principle of existing solutions remain essentially unchanged, and local changes are made to existing products to extend the product life or to expand products' applications. "Adaptable design" achieves "saving" by adapting and reusing existing products based on their functionality, and comparative analysis in the design decision process can be made in a quantifiable way along with other design criteria. Sand and Gu developed modular and upgraded planning methods for the adaptable design, and applied them by examples [ [34] ]. Fletcher et al. proposed a quantitative calculation method for adaptability [ [35] ]. Xu et al. proposed an adaptable redesign and improved the metrics by quantifying the structural similarity and performance brought by adaptable design [ [36] ].

Since the adaptable design theory concept was proposed, many adaptable design methods and applications have been further developed and improved in the past decade [ [37] ]. To quantitatively evaluate the resource-saving effect of product platform design, Chen et al. proposed an adaptability-oriented parametric product platform construction method [ [38] ]. Based on the similarity analysis, Chen et al. combined the information entropy concept with the product modularity principle, and proposed an improved adaptability calculation using the adaptable information entropy function to characterize the product boom complexity and uncertainty [ [39] ].

## 3. Methodology

### 3.1 Research Process

Firstly, the recommendations for household epidemic prevention and the characteristics of residential vestibules are explored through the literature review in this study. Then a combination of literature and questionnaires is used to summarize the categories of household anti-epidemic supplies and products commonly used in the vestibule, and the two product categories are aggregated into a target adaptable set. Secondly, the functional configuration of each product is then separated one by one. Finally, the adaptability metric is then carried out, and adaptable design applications are developed based on the adaptability value level of the PF (Figure 2).

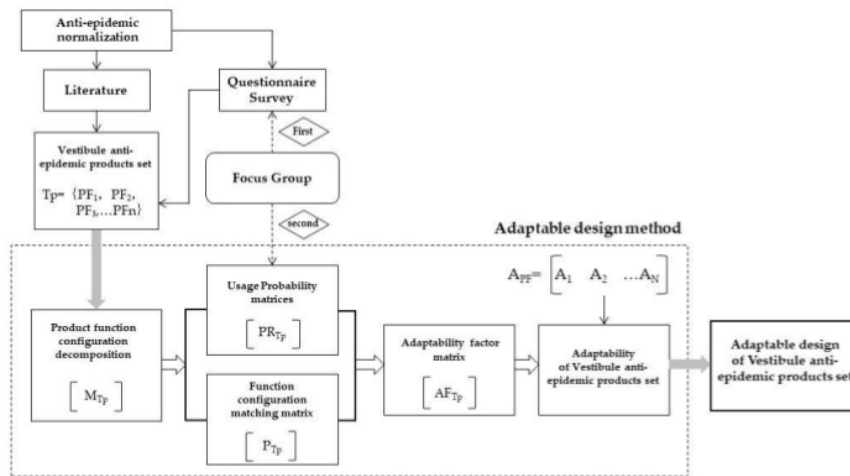

Figure 2. Fuzzy Logic based Adaptable Design process of Vestibule Anti-epidemic Products.

### 3.2 Survey Design

A survey was discussed and designed based on WHO, CDC and expert recommendations for anti-epidemic, combined with a focus group approach to further identify acceptable household anti-epidemic products for Chinese families. Krueger and Casey suggested that focus groups can be used to assess demands and assets, develop social marketing efforts, pilot-test ideas and products, and evaluate services or programs [ [40] ]. Group members linked their experiences and reflection, and some common reference frames may emerge among members [ [41] ]. The number of focus group members is usually 5-8, as smaller groups show greater potential [ [40] ]. Eight criteria for focus group work based on Krueger's research was proposed by Rabiee [ [42] ], serving as the main basis for the implementation of the focus group approach in this study.

The focus group consists of six members with design-based backgrounds including Health attendant, Medical product engineer, Medical doctor, Nurse, Medical trainee (Table 2). The purpose was to discuss the influencing factors of "household anti-epidemic" from multiple perspectives, so as to develop a questionnaire.

Table 2. Demographics of focus group members.

| Member | Gender | Education    | Professional background  | Years of Working |
|--------|--------|--------------|--------------------------|------------------|
| A      | Male   | Postgraduate | Medical product engineer | 11               |
| B      | Male   | Postgraduate | Medical product engineer | 10               |
| C      | Female | Postgraduate | Health attendant         | 6                |



|   |        |              |                 |   |
|---|--------|--------------|-----------------|---|
| D | Female | Postgraduate | Medical doctor  | 6 |
| E | Female | Postgraduate | Nurse           | 5 |
| F | Female | Postgraduate | Medical trainee | 3 |

Through three rounds of discussion, a consensus was reached as follows: factors such as family members, living conditions, knowledge of epidemic prevention information, disinfection habits and acceptable cost of epidemic prevention have a great influence on household epidemic prevention. Therefore, a questionnaire on "household anti-epidemic condition" was drafted in four parts including "participants' personal information", "knowledge of epidemic prevention", "household epidemic prevention habits" and "household anti-epidemic products consumption". Besides, the descriptive language was used to make it easier for participants to make judgments based on their actual situations.

### 3.3 Adaptability Measure

Based on the adaptable design theory proposed by Gu [ [33] ], an improved adaptability measure is developed by combining the paired comparison matrix technique and fuzzy theory in this study. The formula for matching adaptability factors to product functionality is as follows:

$$AF(Tpi) = pr(PFi|PFj) \cdot p(PFi|PFj) = pr(PFi|PFj) \cdot \frac{Inf(PFi \cap PFj)}{Inf(PFi)} \quad (5)$$

$$P(Tpi) = p(PFi|PFj) = \frac{Inf(PFi \cap PFj)}{Inf(PFi)} \quad (6)$$

In Equation (5),  $Tp=PF_i|PF_j$  denotes a  $Tp$ ,  $PF$  denotes a product function unit with a functional configuration set, and  $Tp$  is the conversion of the product from  $PF_j$  to  $PF_i$  through an adaptable process.  $p(PF_i|PF_j)$  denotes the functional configuration matching degree when converting  $PF_j$  is converted to  $PF_i$  through an adaptable process.  $pr(PF_i|PF_j)$  denotes  $PF_i$  usage probability when users have  $PF_j$ , and is the weighted value for the functional configuration matching degree. As the adaptability factor (AF) of  $Tp$ ,  $AF(Tp)$  is defined as the degree of adaptable conversion from  $PF_j$  into  $PF_i$ , i.e. the product of  $PF_i$  matching degree and  $PF_i$  usage probability.

In Equation (6),  $PF_i \cap PF_j$  represents the  $PF_i$  and  $PF_j$  shared functional configurations set;  $Inf(PF_i \cap PF_j)$  represents the sum of generalized costs of  $PF_i$  and  $PF_j$  shared functional configurations set, i.e. the resources sum consumed by shared functional configurations set; these shared configurations cost is preserved during the  $PF_j$  to  $PF_i$  conversion;  $Inf(PF_i)$  represents the sum of broad costs of all functional configurations of  $PF_i$ , i.e. the sum of resources consumed in designing the product.

$AF(Tpi)=AF(PF_i|PF_j)$  indicates that the adaptable capacity of  $PF_i$  to become  $PF_j$ . Similarities in function or constraints between  $PF_i$  and  $PF_j$  can be one or more. The adaptability factor (AF) has a value range of [0, 1]. If  $AF = 0$ , then  $PF_i$  has no common

part at all and the  $PF_j$  and the  $PF_i$  cannot be reused by modifying the  $PF_j$ ; if  $0 < AF < 1$ ,  $PF_i$  and  $PF_j$  have common parts, and partial  $PF_i$  can be reused in  $PF_j$  through modification; if  $AF = 1$ ,  $PF_i$  and  $PF_j$  are the same, and no modification is needed.

The summed average of the adaptability factors for each  $PF_j$  transformed into a  $PF_i$  within the  $T_p$  is the adaptability for each  $PF_i$ , given by the following formula:

$$A(PF_i) = \frac{1}{n} \sum_{i=1}^n p_i(PF_i|PF_j) \frac{Inf(PF_i \cap PF_j)}{Inf(PF_i)} \quad (7)$$

In Equation (7),  $A(PF_i)$  denotes the  $PF_i$  adaptability, the larger the value, the better the adaptability of the  $PF_i$ .

The "vestibule anti-epidemic products set" gathered from literature and questionnaires is defined as "Target Adaptable Set" and then adaptability metric, specific steps are conducted as follows:

1. Definition of adaptable design objectives and products: the types of products commonly used in the vestibule and household anti-epidemic products are determined according to customers' demands.
2. Solution planning for product function configuration: Customers' requirements are matched with corresponding functions to determine the main functions and restraints of target products, and functional configuration is established through case studies.
3. Commonality check of the functional configuration: compare and analyze the commonalities between "product functions", including the similarities between functions and usage states. The determination of these commonalities can be used to develop shared or clustered content for new product designs.
4. Judgment of the product usage probability: based on the expert evaluation method, the usage probability of "product functions" with each other is judged to get usage frequency of each product in the whole system, which is as the weight of the common functions for the function configuration.
5. Adaptability measurement and design: the adaptability value of the "vestibule anti-epidemic products set" is calculated, and the results are ranked according to the adaptability degree. The "product function" which should be prioritized for adaptable design is determined to save costs and adapt to demand.

### 3.4 PF Configuration Analysis

Literature and questionnaires were used to obtain basic types of vestibule products and household anti-epidemic products, as the basis for establishing the image relationship between products and functions. A function-based sign process model was developed, which was derived from a process model similar to the Axiomatic Design proposed by Suh [37]. The model was divided into four distinct design components or four domains, including Customer Domain, Functional

Domain, Physical Domain and Process Domain respectively. In this study, the function and anti-epidemic requirements of a residential vestibule correspond to Customer Domain, the required product types correspond to the Functional Domain, and the function configuration consisting of numerous functions and constraints corresponds to Physical Domain. The function configuration expression is defined as a functional structure consisting of matter, energy, and signal [ [43] , [44] ]. The transfer of matter, energy and signal of a product is an inherent property of its physical functions, which is used to identify the product's operational activities and utilities, and the function is achieved through its physical structure [ [45] ]. Figure 3 shows the functional configuration decomposition of Product.

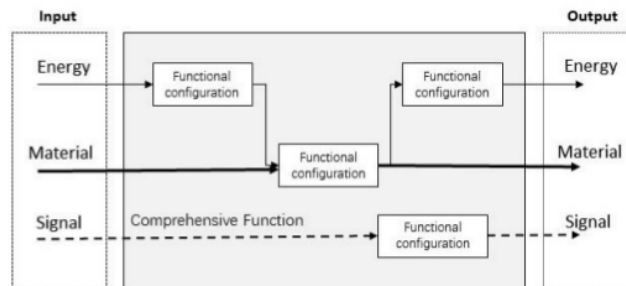

**Figure 3.** Functional configuration decomposition of Product.

### 3.5 Assessment of Usage Probability of Product Functions

In Equations (5) and (7),  $pr(PF_i|PF_j)$  is the usage probability or frequency of the product functions, which is predicted by specific information such as previous sales records and market research. In this study, the usage probability of product functions is expressed as the probability of needing  $PF_i$  when using  $PF_j$ , however, the usage probability of the vestibule anti-epidemic product functions is difficult to be predicted by this method.

A focus group of experts was formed to assess the usage probability of vestibule anti-epidemic product functions. Since the study involved the requirements of household usage and epidemic prevention measures, 13 experts with professional and technical experience in design and health care were gathered, ensuring the relative high validity of the assessment results for the interoperability probability of product functions. Group discussion was performed to promote the consensus of judgment, ensuring the high confidence of the results. Moreover, the consensus of judgment was promoted with high results reliability. In the group discussion, the purpose and content of this study were introduced, the evaluation method was explained, as well as the product functions, usage scenarios and states. After discussion, the assessment was carried out using probabilistic semantic variables and paired comparison matrixes, and the assessment probability value was combined with fuzzy theory to obtain the probability value of PF usage in the end.

The values of usage probability assessments for product functions were transformed into a matrix of probabilistic semantic variables, and then transformed into fuzzy probabilities, as shown in Table 1. The geometric mean algorithm was used to synthesize 13 experts' fuzzy probability matrix Equation (8). and finally the central value method (Equation 7) was used to obtain the probability judgment value  $R_{\tilde{N}_i}$  for defuzzification. In this study,  $R_{\tilde{N}_i}$  is defined as  $pr(PF_i|PF_j)$  to obtain the likelihood of defuzzification of the usage probability for vestibule anti-epidemic products. Where  $\tilde{N}_{PR}$  is the fuzzy probability matrix for integrating the kth member;  $\tilde{N}_{PR}^k$  is the fuzzy probability matrix evaluated by the kth member; and k is the number of members.

$$\tilde{N}_{PR} = \sqrt[k]{\tilde{N}_{PR}^1 \otimes \tilde{N}_{PR}^2 \otimes \tilde{N}_{PR}^3 \otimes \dots \otimes \tilde{N}_{PR}^k} \quad (8)$$

## 4. Results

### 4.1 Common Vestibule and Household Anti-epidemic Products

In the context of China some provinces have become low-risk areas for epidemics, such as Jiangsu and Fujian, and gradually pushed forward the work and production resumption in various industries. The epidemic development in the two provinces is relatively similar and representative, namely the epidemic prevention normalization is started earlier in these provinces. Therefore, the main participants of this research were concentrated in Fujian (37.21%) and Jiangsu (24.19%), followed by Beijing (5.58%) and Zhejiang (5.12%). Through the "Questionnaire Star" software, the online survey was conducted between April 1 and May 4, 2020. 215 participants were involved, among which 204 completed it. The majority of the respondents were between 19 and 30 years old (58.14%), with the majority of the females. Most of them are living with their parents in three-bedroom households, and their basic information is shown in Table 3.

**Table 3.** Participants basic information.

| Question        | Options and Data |                    |          |              |          |              |        |
|-----------------|------------------|--------------------|----------|--------------|----------|--------------|--------|
| Age             | Under 18         | 19-20              | 21-30    | 31-40        | Above 40 |              |        |
| (Years)         | 22               | 51                 | 74       | 24           | 44       |              |        |
|                 | (10.23%)         | (23.72%)           | (34.42%) | (11.16%)     | (20.47%) |              |        |
| Gender          | Male             |                    |          | Female       |          |              |        |
|                 | 57 (26.51%)      |                    |          | 158 (73.49%) |          |              |        |
| *Family members | Live alone       | Brothers & sisters | Children | Couple       | Parents  | Grandparents | Others |

|            |             |             |               |              |        |        |       |
|------------|-------------|-------------|---------------|--------------|--------|--------|-------|
|            | 13.02%      | 25.58%      | 15.81%        | 24.65%       | 66.51% | 12.56% | 2.79% |
| House type | One bedroom | Two bedroom | Three bedroom | Four bedroom | More   |        |       |
|            | 6.51%       | 27.91%      | 44.65%        | 13.02%       |        | 7.91%  |       |

Note: \* indicates multiple choice, The other is one choice.

More participants have chosen "Personal epidemic prevention levels and measures" (57.67%) while relatively more have chosen "Know the number of new infections and cures in your region every day" (56.28%). Most participants believed that there should be three products <sup>23</sup> home: disinfectants (alcohol, sodium hypochlorite), masks and thermometers, as shown in Table 4.

**Table 4.** Knowledge of Epidemic Prevention.

| Question                                                                 | Options and Data                                                            |                   |        |        |                  |        |
|--------------------------------------------------------------------------|-----------------------------------------------------------------------------|-------------------|--------|--------|------------------|--------|
| How much do you know about epidemic prevention levels and measures?*     | All                                                                         |                   |        |        |                  | 11.16% |
|                                                                          | Personal epidemic prevention levels and measures                            |                   |        |        |                  | 57.67% |
|                                                                          | National epidemic prevention levels and measures                            |                   |        |        |                  | 24.65% |
|                                                                          | Lack of knowledge                                                           |                   |        |        |                  | 6.51%  |
| How much do you know about the epidemic in your region?                  | Know the number of new infections and cures in your region every day        |                   |        |        |                  | 56.28% |
|                                                                          | Know the development of the epidemic situation in the region in recent days |                   |        |        |                  | 29.3%  |
|                                                                          | Know something                                                              |                   |        |        |                  | 13.49% |
|                                                                          | Lack of knowledge                                                           |                   |        |        |                  | 0.93%  |
| What Epidemic prevention products do you think you should have at home?* | Disinfectant                                                                | Temperature meter | Mask   | Gloves | Medical detector | Other  |
|                                                                          | 91.16%                                                                      | 82.79%            | 97.67% | 39.07% | 12.56%           | 55.35% |

Note: \* indicates multiple choice, The other is one choice.

In addition, more participants have selected "Simple disinfection before entering the house" (53.14%). 50.86% of participants were disinfected for 5-10 minutes daily and 42.29% were willing to disinfect once a day. In contrast, 40% were willing to disinfect 2-3 times a week. Participants' price acceptance range for household anti-epidemic products was more likely to be within 60 Dollars, and more households during the survey period have spent between 30-60 Dollars (32.09%), followed by 90-150 Dollars (27.44%), as shown in Table A1.

In summary, more women than men have participated in the questionnaire survey, lived with their elders in three-bedroom houses, known more about personal epidemic prevention measures, and paid more attention to the daily epidemic changes in the city. Most participants have simple disinfection behaviors at the door side when entering houses, and are willing to spend 5-10 minutes for disinfecting once daily or 2-3 times a week. There is also a consensus among the participants that three main types of products should be available at home: masks, disinfectants and thermometers. Chi-square test was conducted for gender using EXCEL software (Table 5). The results show that there is no significant difference between men and women in the question of necessary anti-epidemic products stocking at home ( $\chi^2=1.27$ ,  $p= (0.937>0.05)$ ); in addition, Chi-square test of different ages reveals that there is a significant difference between ages in the question of the necessary anti-epidemic products stocking at home ( $\chi^2=19.56$ ,  $p= (0.001 < 0.05)$ ). However, after performing a Chi-square test for different ages for the three generally accepted types of anti-epidemic products, it is learned that there is no significant difference ( $\chi^2= 1.00$ ,  $p=0.80>0.05$ ) (Table 6). By comparing the price acceptance of anti-epidemic products with the current spending of households on that, it can be judged that most of them can accept less than RMB 400 Yuan.

**Table 5.** Chi-square Test for Gender about Household Anti-epidemic Products.

| Gender |          | Disinfectant | Temperature meter | Mask   | Gloves | Medical detector | Other |
|--------|----------|--------------|-------------------|--------|--------|------------------|-------|
|        |          | Male         | Observed          | 50     | 44     | 56               | 15    |
|        | Expected | 49.60        | 45.05             | 53.14  | 18.22  | 6.83             | 33.15 |
| Female | Observed | 146          | 134               | 154    | 57     | 19               | 98    |
|        | Expected | 146.40       | 132.95            | 156.86 | 53.78  | 20.17            | 97.85 |
|        | $\chi^2$ | 1.27         |                   |        |        |                  |       |
|        | p        | 0.94         |                   |        |        |                  |       |

Note:  $\alpha=0.05$ .

**Table 6.** Chi-square Test for Age about Three Main Household Anti-epidemic Products.

| Age      |          | Disinfectant | Temperature meter | Mask  |
|----------|----------|--------------|-------------------|-------|
| Under 18 | Observed | 20           | 20                | 20    |
|          | Expected | 20.06        | 18.21             | 21.49 |
| 19-20    | Observed | 47           | 42                | 49    |
|          | Expected | 46.49        | 42.22             | 49.81 |



|          |          |       |       |       |
|----------|----------|-------|-------|-------|
| 21-30    | Observed | 68    | 65    | 74    |
|          | Expected | 67.46 | 61.27 | 72.28 |
| 31-40    | Observed | 19    | 19    | 24    |
|          | Expected | 21.88 | 19.87 | 23.44 |
| Above 40 | Observed | 42    | 32    | 43    |
|          | Expected | 40.11 | 36.43 | 42.98 |
| $\chi^2$ | 1.00     |       |       |       |
| p        | 0.80     |       |       |       |

Note:  $\alpha=0.05$ .

## 4.2 Functional Configuration for Vestibule Anti-epidemic Products

Based on the above study, the main household anti-epidemic demands are as follows: hand cleaning and disinfection, cleaning and disinfection of frequently contacted surfaces, respiratory hygiene, close attention to symptoms such as fever, and maintaining social distance. Corresponding to anti-epidemic demands, the items are disinfectants, masks and thermometers. The disinfectants include products derived from disinfectant wipes and disinfectant sprays, and thermometers are the common handheld infrared ones (Table A2).

Based on the literature, the basic functional needs of the vestibule include: removal of shoes, coats and hats, social interaction between hosts and guests, and space blocking. Common products corresponding to the vestibule functions are: shoe cabinets, shoe pullers, shoe changing stools, coat racks, doorbells, and partitions (Table A2).

Since it was known from the survey that affordable and practical anti-epidemic products are more popular, 10 vestibule anti-epidemic products (Table A3,A4) are defined as Tp, and each product was defined as product functional Unit (PF) in this study. Based on the principle of basic (essential) functional requirements, the corresponding product prototypes are selected from the market and the functional separation is carried out in terms of energy, matter and information. Figure 4 shows the functional configuration structure of the disinfectant wipes. This is an abstract and direct way to translate requirements into functional configurations, and the remaining nine products are constructed by this method to perform the adaptability measurement.

The configuration construction of PF is conducted by two steps: (1) decompose the elements or constraints that constitute the PF, and (2) express them in common terms. As a result, the consistency of functional description is ensured, and the easy design analysis and quantification are realized. Meanwhile, different types of product functions can be compared to find the similarity of design concepts from the

essence. Common words are used to express the configuration and draw a functional configuration matrix. The amount of configuration information is expressed as the numbers "0" and "1". "0" indicates that PF does not have this configuration, while "1" indicates that the PF has this configuration (Table A5).

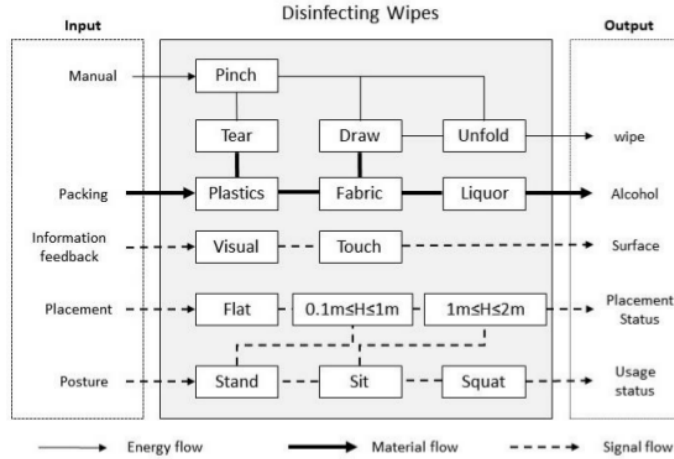

Figure 4. Functional Configuration of Disinfectant Wipes.

### 4.3 Vestibule Anti-epidemic Products Functional Configuration

#### Matching Analysis

According to the table, Equation (6) is applied to calculate the matching degree between the functions of each product. After calculation, the matching degree matrix P (Tp) is obtained. From the table, we can see that "PF<sub>1</sub>" is disinfectant wipes, PF<sub>1</sub>={ Pinch<sub>1</sub>, Draw<sub>1</sub>, Unfold<sub>1</sub>, Press<sub>1</sub>, Cloth<sub>1</sub>, Plastic<sub>1</sub>, Liquid<sub>1</sub>, Stand<sub>1</sub>, Sit<sub>1</sub>, Squat<sub>1</sub>, 0.1m≤H≤1m<sub>1</sub>, 1m≤H≤2m<sub>1</sub>, Flat<sub>1</sub>, Visual<sub>1</sub>, Tactile<sub>1</sub>}; "PF<sub>2</sub>" is disinfectant spray, PF<sub>2</sub> = Hydraulic<sub>2</sub>, Pneumatic<sub>2</sub>, Pull<sub>2</sub>, Press<sub>2</sub>, Grip<sub>2</sub>, Plastic<sub>2</sub>, Liquid<sub>2</sub>, Stand<sub>2</sub>, Sit<sub>2</sub>, Squat<sub>2</sub>, 0.1m≤H≤1m<sub>2</sub>, 1m≤H≤2m<sub>2</sub>, Flat<sub>2</sub>, Standing<sub>2</sub>, Visual<sub>2</sub>, Tactile<sub>2</sub> }. The p-values of "PF<sub>1</sub>" and "PF<sub>2</sub>" are derived and calculated as follows:

$$P(Tp_1) = \frac{Inf(PF_1 \cap PF_2)}{Inf(PF_1)} = \frac{10}{15} = 0.67 . \quad (9)$$

Table 7 shows the function match matrix for the 10 product categories, indicating the matching degree between PF<sub>j</sub> and PF<sub>i</sub> when "PF<sub>j</sub>" is adaptable transformed into "PF<sub>i</sub>". The higher value, the better match of the functional configuration. P is the summed average of the column entries in the matrix, A higher value indicates a higher similarity that the PF is to other PF in this set.

**Table 7.** Results of  $p(PF_i|PF_j)$  ( $P_{Tp}$ ).

| No.             |      | PF <sub>i</sub> |      |      |      |      |      |      |      |      |      |
|-----------------|------|-----------------|------|------|------|------|------|------|------|------|------|
|                 |      | 1               | 2    | 3    | 4    | 5    | 6    | 7    | 8    | 9    | 10   |
|                 |      | DW              | DS   | M    | TM   | SS   | SH   | SC   | CR   | D    | S    |
| PF <sub>j</sub> | 1 DW | 1.00            | 0.63 | 0.73 | 0.61 | 0.50 | 0.53 | 0.47 | 0.47 | 0.50 | 0.57 |
|                 | 2 DS | 0.67            | 1.00 | 0.53 | 0.56 | 0.60 | 0.60 | 0.53 | 0.67 | 0.40 | 0.64 |
|                 | 3 M  | 0.73            | 0.50 | 1.00 | 0.56 | 0.40 | 0.67 | 0.53 | 0.53 | 0.40 | 0.50 |
|                 | 4 TM | 0.73            | 0.63 | 0.67 | 1.00 | 0.60 | 0.67 | 0.59 | 0.60 | 0.80 | 0.64 |
|                 | 5 SS | 0.33            | 0.38 | 0.27 | 0.33 | 1.00 | 0.60 | 0.41 | 0.53 | 0.20 | 0.50 |
|                 | 6 SH | 0.53            | 0.56 | 0.67 | 0.56 | 0.90 | 1.00 | 0.53 | 0.73 | 0.50 | 0.71 |
|                 | 7 SC | 0.53            | 0.56 | 0.60 | 0.56 | 0.70 | 0.60 | 1.00 | 0.87 | 0.50 | 0.79 |
|                 | 8 CR | 0.47            | 0.63 | 0.53 | 0.50 | 0.80 | 0.73 | 0.76 | 1.00 | 0.40 | 0.79 |
|                 | 9 D  | 0.33            | 0.25 | 0.27 | 0.44 | 0.20 | 0.33 | 0.29 | 0.27 | 1.00 | 0.29 |
|                 | 10 S | 0.53            | 0.56 | 0.47 | 0.50 | 0.70 | 0.67 | 0.65 | 0.73 | 0.40 | 1.00 |
|                 | P    | 0.59            | 0.57 | 0.57 | 0.56 | 0.64 | 0.64 | 0.58 | 0.64 | 0.51 | 0.64 |

#### 4.4 Evaluation of the Usage Probability of Vestibule Anti-epidemic

##### Products

When hand sanitizing, it is necessary to get antiseptic wipes or disinfectant spray from a shoe drawer, or get them while sitting on a shoe changing stool. Hence, there is a usage correlation between the need for hand sanitizing and the use of multiple products. In this study, a paired comparison matrix of product functions is used to evaluate usage probability through the re-use of focus groups. The group consists of 13 experts in both Design, Engineering, Medical and Health care fields with years of experience in practice, research and education (Table A6).

The focus group discussion was conducted in the context of the anti-epidemic normalization in family life, focusing on prevention and maintenance of personal hygiene and safety in thoughts and behaviors. Group members were asked to make initial judgments based on their professional experience. Usage probability semantic variable (Table 1) determines the likelihood (probability) that "PF<sub>i</sub>" will be used when "PF<sub>j</sub>" is used. Instead of probabilistic semantic variables, members make assessments using values of "1,2,3,4,5" to express the probability. For example, when "PF<sub>j</sub>" is used, the need to use "PF<sub>i</sub>" is straightforward and frequent, the number "5" is used; when the needing is average, "3" is used; when it is extremely improbable to be used

at all, "1" is used. After group discussion and evaluation, there were 45 paired comparisons with a Cronbach  $\alpha$  coefficient = 0.965, indicating the high quality of the study data confidence level. After analyzing the variation degree assessed by members, the standard deviation was found to be between 0.73 and 1.58, with a standard deviation < 1. There were 16 comparisons and 29 comparisons with standard deviations  $\geq 1$  (Table A7).

The values of usage probability assessments for product functions were transformed into a matrix of probabilistic semantic variables, and then transformed into fuzzy probabilities (Table 1). The geometric mean algorithm was used to synthesize 13 experts' fuzzy probability matrix Equation (8), and finally the Equation (4) was used to obtain the probability judgment value  $R_{N_i}$  for defuzzification. In this study,  $R_{N_i}$  is defined as  $pr(PF_i|PF_j)$  to obtain the likelihood of defuzzification of the usage probability matrix  $PR_{Tp}$  (Table 8) for vestibule anti-epidemic products. Finally, PR is the summed average of the column entries in the matrix. The PR value of "PF" is 0.28-0.37. A higher value indicates a higher probability that the PF will be used in the set.

**Table 8.** Results of  $pr(PF_i|PF_j)$  ( $PR_{Tp}$ ).

| No.             |      | PF <sub>i</sub> |      |      |      |      |      |      |      |      |      |
|-----------------|------|-----------------|------|------|------|------|------|------|------|------|------|
|                 |      | 1               | 2    | 3    | 4    | 5    | 6    | 7    | 8    | 9    | 10   |
|                 |      | DW              | DS   | M    | TM   | SS   | SH   | SC   | CR   | D    | S    |
| PF <sub>j</sub> | 1 DW | 1.00            | 0.56 | 0.27 | 0.22 | 0.20 | 0.19 | 0.27 | 0.20 | 0.25 | 0.19 |
|                 | 2 DS | 0.56            | 1.00 | 0.60 | 0.21 | 0.19 | 0.19 | 0.23 | 0.21 | 0.26 | 0.23 |
|                 | 3 M  | 0.27            | 0.60 | 1.00 | 0.24 | 0.16 | 0.16 | 0.23 | 0.21 | 0.19 | 0.18 |
|                 | 4 TM | 0.22            | 0.21 | 0.24 | 1.00 | 0.19 | 0.16 | 0.19 | 0.21 | 0.18 | 0.16 |
|                 | 5 SS | 0.20            | 0.19 | 0.16 | 0.19 | 1.00 | 0.27 | 0.29 | 0.27 | 0.19 | 0.21 |
|                 | 6 SH | 0.19            | 0.19 | 0.16 | 0.16 | 0.27 | 1.00 | 0.28 | 0.23 | 0.17 | 0.18 |
|                 | 7 SC | 0.27            | 0.23 | 0.23 | 0.19 | 0.29 | 0.28 | 1.00 | 0.26 | 0.20 | 0.23 |
|                 | 8 CR | 0.20            | 0.21 | 0.21 | 0.21 | 0.27 | 0.23 | 0.26 | 1.00 | 0.18 | 0.23 |
|                 | 9 D  | 0.25            | 0.26 | 0.19 | 0.18 | 0.19 | 0.17 | 0.20 | 0.18 | 1.00 | 0.21 |
|                 | 10 S | 0.19            | 0.23 | 0.18 | 0.16 | 0.21 | 0.18 | 0.23 | 0.23 | 0.21 | 1.00 |
|                 | PR   | 0.33            | 0.37 | 0.32 | 0.28 | 0.30 | 0.28 | 0.32 | 0.30 | 0.28 | 0.28 |

#### 4.5 Adaptability of Vestibule Anti-epidemic Products

According to Equation (5), the adaptability factor AF (PF<sub>i</sub>|PF<sub>j</sub>) is the product of product function usage probability *pr* (PF<sub>i</sub>|PF<sub>j</sub>) and the matching degree *p* (PF<sub>i</sub>|PF<sub>j</sub>). In this study, *pr* (PF<sub>i</sub>|PF<sub>j</sub>) is replaced with the probability judgment value of defuzzification, so AF(PF<sub>1</sub>) is calculated as in Equation (10). AF<sub>TP</sub> matrix is derived (Table 9), from which the adaptability factor of the target adaptable set is known, and the higher value indicates the higher feasibility when PF<sub>j</sub> is transformed or clustered into PF<sub>i</sub>. According to Equation (7), the adaptability A (PF<sub>i</sub>) is 0.18-0.24, the higher the value, the higher the adaptability of PF.

$$AF(PF_1) = R_{\bar{n}_2} \cdot \frac{Inf(PF_1 \cap PF_2)}{Inf(PF_1)} = 0.93 \times 0.5 = 0.47 \quad (10)$$

**Table 9.** Results of AF (AF<sub>TP</sub>).

| No.             |      | PF <sub>i</sub> |      |      |      |      |      |      |      |      |      |
|-----------------|------|-----------------|------|------|------|------|------|------|------|------|------|
|                 |      | 1               | 2    | 3    | 4    | 5    | 6    | 7    | 8    | 9    | 10   |
|                 |      | DW              | DS   | M    | TM   | SS   | SH   | SC   | CR   | D    | S    |
| PF <sub>j</sub> | 1 DW | 1.00            | 0.35 | 0.20 | 0.13 | 0.10 | 0.10 | 0.13 | 0.09 | 0.13 | 0.11 |
|                 | 2 DS | 0.37            | 1.00 | 0.32 | 0.12 | 0.11 | 0.11 | 0.12 | 0.14 | 0.11 | 0.15 |
|                 | 3 M  | 0.20            | 0.30 | 1.00 | 0.14 | 0.07 | 0.11 | 0.12 | 0.11 | 0.07 | 0.09 |
|                 | 4 TM | 0.16            | 0.13 | 0.16 | 1.00 | 0.11 | 0.11 | 0.11 | 0.13 | 0.15 | 0.11 |
|                 | 5 SS | 0.07            | 0.07 | 0.04 | 0.06 | 1.00 | 0.16 | 0.12 | 0.14 | 0.04 | 0.10 |
|                 | 6 SH | 0.10            | 0.10 | 0.11 | 0.09 | 0.24 | 1.00 | 0.15 | 0.17 | 0.09 | 0.13 |
|                 | 7 SC | 0.14            | 0.13 | 0.14 | 0.11 | 0.21 | 0.17 | 1.00 | 0.22 | 0.10 | 0.18 |
|                 | 8 CR | 0.09            | 0.13 | 0.11 | 0.11 | 0.22 | 0.17 | 0.20 | 1.00 | 0.07 | 0.18 |
|                 | 9 D  | 0.08            | 0.07 | 0.05 | 0.08 | 0.04 | 0.06 | 0.06 | 0.05 | 1.00 | 0.06 |
|                 | 10 S | 0.10            | 0.13 | 0.09 | 0.08 | 0.15 | 0.12 | 0.15 | 0.17 | 0.08 | 1.00 |
|                 | A    | 0.23            | 0.24 | 0.22 | 0.19 | 0.22 | 0.21 | 0.22 | 0.22 | 0.18 | 0.21 |

## 5. Discussion

In this study, the functional decomposition of matter, energy and information in the product is based on the input and output case, and the matching degree *p*-value is calculated based on the segmentation of functional configuration, and the product functional matching degree matrix (P<sub>TP</sub>) is obtained. As shown in Table 13, P is between 0.51 and 0.64, and the larger the value, the more appropriate the matching of PF<sub>j</sub> to the functional configuration of PF<sub>i</sub>. It can be seen that the functional configurations of the products for different applications match each other

differently. For example,  $p$ -value is 0.67 if PF<sub>2</sub> (disinfectant spray) is converted to PF<sub>1</sub> (disinfectant wipes), but  $p$ -value is 0.63 for the conversion of PF<sub>1</sub> to PF<sub>2</sub>. It indicates that the functional configuration of the disinfectant spray can be more adaptable when converted to disinfectant wipes.

The usage probability of product functions in space is a rather vague concept, and there are independence and connectedness in various product usage. To accurately explore the interconnectedness of product use, a focus group approach is proposed by the paired comparison matrix technique in this study to assess PF usage probability. Subsequently, a focus group approach is combined with fuzzy theory to obtain more accurate probability values and matrices of product use. Finally, the probability matrix and the matching degree matrix are multiplied to obtain the Adaptable Factor Matrix (AF<sub>TP</sub>), and adaptability A values (Figure 4). The highest value of adaptability in the set is PF<sub>2</sub> (A=0.24) and the lowest probability is PF<sub>9</sub> (A=0.18). If the functional configuration between all products in the set is the same ( $p=1$ ) and the usage probability is also the highest value ( $pr=1$ ), then AF=1, the ideal maximum A value for the set should be 10. However, the highest A value in the set of actual product functions is 0.24, which is a large difference from the ideal maximum A value, indicating that the similarity of the product functional configurations in a set and their mutual use are not strong. Since the relative adaptability values among the products are mainly investigated in this study, the higher A value of a product indicates that it is more capable of being simplified, clustered, and adapting to changes in the set.

Based on Adaptability (A) values (Figure 5), prioritized product functions for simplifying or clustering in design thinking can be determined by a comparative analysis. The most adaptable one in this set is PF<sub>2</sub>, followed by PF<sub>1</sub>, and the third ones are PF<sub>3</sub>, PF<sub>5</sub>, PF<sub>7</sub> and PF<sub>8</sub>, indicating that they are simplified or clustered with other products to a high degree. Therefore, disinfectant sprays can be prioritized for adaptable design development.

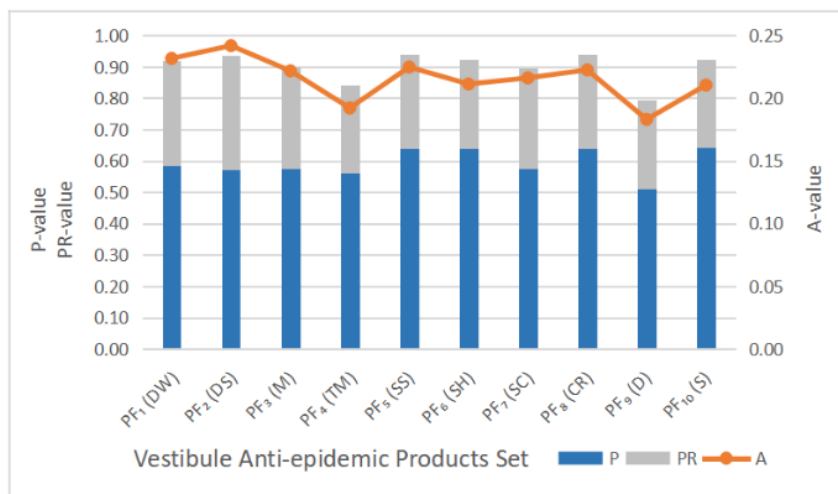

**Figure 5.** Results of Adaptability (A), Probability (PR) and Matching degree (P).



## 6. Conclusion

In the context of COVID-19 normalization, residential vestibule is used as an important area for household epidemic prevention, household epidemic prevention products are adapted to products commonly used in vestibules. The results of a questionnaire survey showed that most of the respondents "know some personal and medical level of epidemic prevention" and "simply disinfect before entering the house", which can support the idea of this study. An improved adaptability metric and design application were proposed to simplify or cluster existing products by reusing similar functional configurations of existing products, to meet the normal functional requirements of future epidemic prevention. The design approach allows for a balance between economic and environmental benefits and is in line with the "household anti-epidemic state" survey, because most people are more receptive to low-cost anti-epidemic products and the upgrading adaptability of vestibule product functions.

Previous research on adaptable design methods has been applied to single products, modular products, and product families. In this study, an adaptable measure of products set within a specific functional space is innovatively proposed and a new method for assessing the functional product usage probability is introduced. Besides, focus group method was used twice: (1) the first use for discussing and developing a questionnaire on the "household anti-epidemic state"; designers, researchers and educators with design backgrounds were involved to generate additional concepts; (2) the second use for improving the assessment of PF usage probability in the adaptability metric; experts from design and health care backgrounds were involved to obtain accurate and broad-valued probability results. However, the results produced by the focus group method are limited by the professional background, experience and cultural factors of the members.

Since the adaptable design method in this study is based on the existing products and requirements, reuse of the existing product functional configurations for developing new designs, there are some limitations on the presumption of new product functional development. Moreover, in the calculation formula of the adaptability degree, a detailed degree of decomposition for product functional configuration will affect the adaptability degree and design development. Based on the basic configuration and product functions usage probability, physical attributes such as quantity, size, and form corresponding to the functional configuration are not discussed. In future studies, product parameters can be refined and Taguchi methods can be used to conduct product optimization design through the experimental process.

**Acknowledgments:** The authors would like to thank the Department of Mathematics of National Taiwan Normal University for helping them to analyze and verify the accuracy of Fuzzy Logic applications in their paper.

## Appendix

**Table A1.** Household Anti-epidemic Habits and Consumption.

| Question                                                                   | Options and Data                              |                                                                    |                  |                      |                              |
|----------------------------------------------------------------------------|-----------------------------------------------|--------------------------------------------------------------------|------------------|----------------------|------------------------------|
| Because of the epidemic, what are the habits of disinfection at home?      | Simple disinfection before entering the house | Regular simple disinfection of household items will be carried out |                  |                      | Forget it after the epidemic |
|                                                                            | 53.14%                                        | 33.71%                                                             |                  |                      | 13.15%                       |
| How much disinfection time would you like to accept?                       | Less than 5 minutes                           | 5-10 minutes                                                       | 10-30 minutes    | More than 30 minutes |                              |
|                                                                            | 25.14%                                        | 50.86%                                                             | 19.43%           | 4.57%                |                              |
| What is the frequency of disinfection?                                     | Once a day                                    | 2-3 times a week                                                   | 1 times per week | 2-3 times a month    |                              |
|                                                                            | 42.29%                                        | 40%                                                                | 13.14%           | 4.57%                |                              |
| How much do you accept for home epidemic prevention products? (USD)        | 0-30                                          | 30-60                                                              | 60-90            | 90-150               | More than 150                |
|                                                                            | 30.23%                                        | 31.63%                                                             | 18.6%            | 10.7%                | 8.84%                        |
| How much have families spent on Epidemic prevention products so far? (USD) | 0-30                                          | 30-60                                                              | 60-90            | 90-150               | More than 150                |
|                                                                            | 17.67%                                        | 32.09%                                                             | 27.44%           | 18.6%                | 4.19%                        |

**Table A2.** Household Anti-epidemic Products and Common Products in the Vestibule.

| The main needs of family epidemic prevention | Household Anti-epidemic Products |                     |      |                   |
|----------------------------------------------|----------------------------------|---------------------|------|-------------------|
|                                              | Disinfecting Wipes               | Disinfectant sprays | Mask | Temperature meter |
| Clean and disinfect hands                    | √                                | √                   |      |                   |

|                                                       |                                         |          |              |           |          |        |
|-------------------------------------------------------|-----------------------------------------|----------|--------------|-----------|----------|--------|
| Disinfecting the areas that are hot-spots for germs   | √                                       | √        |              |           |          |        |
| Respiratory health                                    |                                         |          |              |           | √        |        |
| Pay close attention to fever and other symptoms       |                                         |          |              |           |          | √      |
| <b>Basic functional requirements of the vestibule</b> | <b>Common products in the vestibule</b> |          |              |           |          |        |
|                                                       | Shoes Changing Stool                    | Shoehorn | Shoe cabinet | Coat rack | Doorbell | Screen |
| Changing the shoes                                    | √                                       | √        |              |           |          |        |
| Storage of shoes                                      |                                         |          | √            |           |          |        |
| Take off your coat and hat                            |                                         |          |              | √         |          |        |
| Host/guest social interaction                         |                                         |          |              |           | √        |        |
| Space separation                                      |                                         |          |              |           |          | √      |

√:That means the two are related.

**Table A3.** Vestibule Anti-epidemic Products Set —Legend of Product Types.

| Legend of Product Types |                         |                                                                                     |     |               |                                                                                       |
|-------------------------|-------------------------|-------------------------------------------------------------------------------------|-----|---------------|---------------------------------------------------------------------------------------|
| No.                     | Products                | Schematics                                                                          | No. | Products      | Schematics                                                                            |
| 1                       | Disinfecting Wipes (DW) |  | 6   | Shoehorn (SH) |  |

|   |                           |                                                                                   |    |                   |                                                                                     |
|---|---------------------------|-----------------------------------------------------------------------------------|----|-------------------|-------------------------------------------------------------------------------------|
| 2 | Disinfectant Sprays (DS)  |  | 7  | Shoe Cabinet (SC) |  |
| 3 | Mask (M)                  |  | 8  | Coat Rack (CR)    |  |
| 4 | Temperature Meter (TM)    |  | 9  | Doorbell (D)      |  |
| 5 | Shoes Changing Stool (SS) |  | 10 | Screen (S)        |  |

**Table A4.** Vestibule Anti-epidemic Products Set (Based on this research).

| Vestibule Anti-epidemic Products Set (Tp) |                          |                                                          |     |                   |                                                                                                                                                         |
|-------------------------------------------|--------------------------|----------------------------------------------------------|-----|-------------------|---------------------------------------------------------------------------------------------------------------------------------------------------------|
| No.                                       | Products                 | Explain                                                  | No. | Products          | Explain                                                                                                                                                 |
| 1                                         | Disinfecting Wipes (DW)  | Non-woven fabric containing 75% alcohol.                 | 6   | Shoehorn (SH)     | This item can be inserted into the heel of the shoe to avoid direct contact with the shoe by hands, making it convenient and hygienic to wear the shoe. |
| 2                                         | Disinfectant Sprays (DS) | A spray bottle containing alcohol or other disinfectant. | 7   | Shoe Cabinet (SC) | A cabinet for storing shoes and sundries.                                                                                                               |
| 3                                         | Mask (M)                 | Disposable medical mask.                                 | 8   | Coat Rack (CR)    | A bracket for hanging clothes, hats, etc.                                                                                                               |
| 4                                         | Temperature Meter (TM)   | Infrared thermometer.                                    | 9   | Doorbell (D)      | The control signal generated by the                                                                                                                     |

|   |                           |                                                   |    |            |                                                                                                                                                    |
|---|---------------------------|---------------------------------------------------|----|------------|----------------------------------------------------------------------------------------------------------------------------------------------------|
| 5 | Shoes Changing Stool (SS) | A chair for changing shoes in a sitting position. | 10 | Screen (S) | button drives the electrical energy to make the doorbell sound.<br>An object used to keep out the wind, to separate or to block the line of sight. |
|---|---------------------------|---------------------------------------------------|----|------------|----------------------------------------------------------------------------------------------------------------------------------------------------|

**Table A5.** Product Set Function Configuration Matrix ( $M_{Tp}$ ).

| Module configuration of function |             | Vestibule Anti-epidemic Products Set (No.) |    |   |    |    |    |    |    |   |    |   |
|----------------------------------|-------------|--------------------------------------------|----|---|----|----|----|----|----|---|----|---|
|                                  |             | 1                                          | 2  | 3 | 4  | 5  | 6  | 7  | 8  | 9 | 10 |   |
|                                  |             | DW                                         | DS | M | TM | SS | SH | SC | CR | D | S  |   |
| Energy                           | Electricity | 0                                          | 0  | 0 | 1  | 0  | 0  | 0  | 0  | 1 | 0  |   |
|                                  | Light       | 0                                          | 0  | 0 | 1  | 0  | 0  | 0  | 0  | 0 | 0  |   |
|                                  | Hydraulic   | 0                                          | 1  | 0 | 0  | 0  | 0  | 0  | 0  | 0 | 0  |   |
|                                  | Pneumatic   | 0                                          | 1  | 0 | 0  | 0  | 0  | 0  | 0  | 0 | 0  |   |
|                                  | Manual      | Pinch                                      | 1  | 0 | 1  | 1  | 0  | 0  | 0  | 0 | 0  | 0 |
|                                  |             | Draw                                       | 1  | 0 | 1  | 0  | 0  | 0  | 1  | 0 | 0  | 0 |
|                                  |             | Unfold                                     | 1  | 0 | 0  | 0  | 0  | 0  | 0  | 0 | 0  | 0 |
|                                  |             | Pull                                       | 0  | 1 | 0  | 0  | 0  | 0  | 0  | 0 | 0  | 0 |
|                                  |             | Press                                      | 0  | 1 | 0  | 0  | 1  | 1  | 0  | 1 | 0  | 0 |
|                                  |             | Hold                                       | 0  | 1 | 0  | 1  | 1  | 1  | 1  | 1 | 0  | 1 |
|                                  |             | Carry                                      | 0  | 0 | 1  | 0  | 0  | 0  | 1  | 0 | 0  | 0 |
|                                  |             | Hang                                       | 0  | 0 | 1  | 0  | 0  | 1  | 0  | 1 | 0  | 0 |
|                                  |             | Push                                       | 1  | 0 | 0  | 1  | 1  | 1  | 0  | 0 | 1  | 1 |
|                                  |             | Support                                    | 0  | 0 | 0  | 0  | 1  | 0  | 1  | 1 | 0  | 0 |
| Mechanical                       | Slide       | 0                                          | 0  | 0 | 0  | 0  | 0  | 1  | 0  | 0 | 0  |   |
|                                  | Fold        | 0                                          | 0  | 0 | 1  | 0  | 0  | 1  | 0  | 1 | 0  |   |
| Material                         | Metal       | 0                                          | 0  | 0 | 1  | 0  | 0  | 1  | 1  | 1 | 0  |   |
|                                  | Fabric      | 1                                          | 0  | 1 | 0  | 0  | 0  | 0  | 0  | 0 | 0  |   |



|                      |            |           |   |   |   |   |   |   |   |   |   |   |
|----------------------|------------|-----------|---|---|---|---|---|---|---|---|---|---|
|                      | Wood       | 0         | 0 | 0 | 0 | 1 | 1 | 1 | 1 | 0 | 1 |   |
|                      | Glass      | 0         | 0 | 0 | 1 | 0 | 0 | 0 | 0 | 0 | 0 |   |
|                      | Plastics   | 1         | 1 | 0 | 1 | 0 | 0 | 0 | 0 | 1 | 0 |   |
|                      | Liquid     | 1         | 1 | 0 | 0 | 0 | 0 | 0 | 0 | 0 | 0 |   |
|                      | Stand      | 1         | 1 | 1 | 1 | 0 | 1 | 1 | 1 | 1 | 1 |   |
| Signal               | Posture    | Sit       | 1 | 1 | 1 | 1 | 1 | 1 | 1 | 1 | 0 | 1 |
|                      |            | Squat     | 1 | 1 | 1 | 1 | 0 | 1 | 1 | 1 | 0 | 1 |
|                      | Bottom     | 0         | 0 | 0 | 0 | 1 | 1 | 1 | 1 | 0 | 1 |   |
|                      | Height     | 0.1m≤H≤1m | 1 | 1 | 1 | 1 | 1 | 1 | 1 | 1 | 1 | 1 |
|                      |            | 1m≤H≤2m   | 1 | 1 | 1 | 1 | 0 | 1 | 1 | 1 | 1 | 1 |
|                      |            | 2m≤H≤3m   | 0 | 0 | 0 | 0 | 0 | 0 | 0 | 0 | 0 | 1 |
|                      | Placement  | Top       | 0 | 0 | 0 | 0 | 0 | 0 | 0 | 0 | 0 | 1 |
|                      |            | Flat      | 1 | 1 | 1 | 1 | 1 | 1 | 1 | 1 | 0 | 1 |
|                      |            | Side      | 0 | 0 | 1 | 1 | 0 | 1 | 0 | 0 | 0 | 0 |
|                      |            | Erect     | 0 | 1 | 0 | 0 | 0 | 0 | 1 | 1 | 0 | 1 |
| Information feedback | Suspensory | 0         | 0 | 1 | 0 | 0 | 1 | 0 | 0 | 1 | 0 |   |
|                      | Visual     | 1         | 1 | 1 | 1 | 0 | 0 | 1 | 1 | 0 | 1 |   |
|                      | Auditory   | 0         | 0 | 0 | 0 | 0 | 0 | 0 | 0 | 1 | 0 |   |
|                      | Touch      | 1         | 1 | 1 | 1 | 1 | 1 | 0 | 0 | 0 | 0 |   |

**Table A6.** Profile of focus group members.

| Category | Member | Gender | Education    | Professional background | Years of Working |
|----------|--------|--------|--------------|-------------------------|------------------|
| Design   | A      | Male   | Postgraduate | Designer                | 10               |
|          | B      | Female | Postgraduate | Designer                | 7                |
|          | C      | Female | Postgraduate | Design researcher       | 30               |
|          | D      | Male   | Postgraduate | Designer and Researcher | 5                |

|         |   |        |               |                               |    |
|---------|---|--------|---------------|-------------------------------|----|
|         | E | Male   | Postgraduate  | Design researcher and Teacher | 12 |
|         | F | Female | Postgraduate  | Design researcher and Teacher | 18 |
| Medical | G | Female | Postgraduate  | Medical workers               | 4  |
|         | H | Male   | Undergraduate | Medical workers               | 3  |
|         | I | Female | Postgraduate  | Medical workers               | 14 |
|         | J | Female | Postgraduate  | Medical workers               | 3  |
|         | K | Male   | Postgraduate  | Medical workers               | 25 |
|         | L | Female | Postgraduate  | Medical researcher            | 4  |
|         | M | Female | Postgraduate  | Medical Teacher               | 10 |

**Table A7.** Comparator with Standard Deviation of Probability Value.

| Paired comparison<br>(No.) | Number of probabilistic values |   |   |   |   | Mean | SD< 1 |
|----------------------------|--------------------------------|---|---|---|---|------|-------|
|                            | 1                              | 2 | 3 | 4 | 5 |      |       |
| 1 DW—5 SS                  | 5                              | 3 | 5 | 0 | 0 | 2    | 0.91  |
| 1 DW—6 SH                  | 5                              | 5 | 2 | 1 | 0 | 1.92 | 0.95  |
| 2 DS—5 SS                  | 5                              | 4 | 4 | 0 | 0 | 1.92 | 0.86  |
| 2 DS—6 SH                  | 5                              | 5 | 3 | 0 | 0 | 1.85 | 0.80  |
| 3 M—4 TM                   | 3                              | 2 | 7 | 1 | 0 | 2.46 | 0.97  |
| 3 M—5 SS                   | 7                              | 4 | 2 | 0 | 0 | 1.62 | 0.77  |
| 3 M—6 SH                   | 7                              | 4 | 2 | 0 | 0 | 1.62 | 0.77  |
| 3 M—10 S                   | 6                              | 4 | 2 | 1 | 0 | 1.85 | 0.99  |
| 4 TM—5 SS                  | 5                              | 4 | 4 | 0 | 0 | 1.92 | 0.86  |
| 4 TM—6 SH                  | 7                              | 4 | 2 | 0 | 0 | 1.62 | 0.77  |
| 4 TM—9 D                   | 6                              | 3 | 4 | 0 | 0 | 1.85 | 0.90  |
| 4 TM—10 S                  | 7                              | 4 | 2 | 0 | 0 | 1.62 | 0.77  |
| 5 SS—9 D                   | 5                              | 5 | 2 | 1 | 0 | 1.92 | 0.95  |

|           |   |   |   |   |   |      |      |
|-----------|---|---|---|---|---|------|------|
| 6 SH—9 D  | 6 | 5 | 2 | 0 | 0 | 1.69 | 0.75 |
| 6 SH—10 S | 6 | 4 | 3 | 0 | 0 | 1.77 | 0.83 |
| 8 CR—9 D  | 5 | 6 | 2 | 0 | 0 | 1.77 | 0.73 |

| Paired comparison<br>(No.) | Number of probabilistic values |   |   |   |   | Mean  | SD≥ 1 |
|----------------------------|--------------------------------|---|---|---|---|-------|-------|
|                            | 1                              | 2 | 3 | 4 | 5 |       |       |
| 1 DW—2 DS                  | 0                              | 4 | 4 | 3 | 2 | 3.231 | 1.09  |
| 1 DW—3 M                   | 2                              | 3 | 4 | 3 | 1 | 2.85  | 1.21  |
| 1 DW—4 TM                  | 4                              | 3 | 5 | 1 | 0 | 2.23  | 1.01  |
| 1 DW—7 SC                  | 3                              | 1 | 4 | 5 | 0 | 2.85  | 1.21  |
| 1 DW—8 CR                  | 6                              | 2 | 3 | 2 | 0 | 2.08  | 1.19  |
| 1 DW—9 D                   | 4                              | 1 | 3 | 4 | 1 | 2.77  | 1.42  |
| 1 DW—10 S                  | 6                              | 3 | 3 | 1 | 0 | 1.92  | 1.04  |
| 2 DS—3 M                   | 0                              | 3 | 4 | 3 | 3 | 3.46  | 1.13  |
| 2 DS—4 TM                  | 5                              | 2 | 4 | 2 | 0 | 2.23  | 1.17  |
| 2 DS—7 SC                  | 4                              | 2 | 4 | 3 | 0 | 2.46  | 1.20  |
| 2 DS—8 CR                  | 5                              | 3 | 3 | 1 | 1 | 2.23  | 1.30  |
| 2 DS—9 D                   | 3                              | 1 | 6 | 2 | 1 | 2.77  | 1.24  |
| 2 DS—10 S                  | 4                              | 3 | 3 | 2 | 1 | 2.46  | 1.33  |
| 3 M—7 SC                   | 5                              | 2 | 3 | 3 | 0 | 2.31  | 1.25  |
| 3 M—8 CR                   | 5                              | 3 | 3 | 2 | 0 | 2.15  | 1.14  |
| 3 M—9 D                    | 6                              | 3 | 3 | 1 | 0 | 1.92  | 1.04  |
| 4 TM—7 SC                  | 6                              | 3 | 1 | 3 | 0 | 2.08  | 1.26  |
| 4 TM—8 CR                  | 4                              | 5 | 1 | 3 | 0 | 2.23  | 1.17  |
| 5 SS—6 SH                  | 3                              | 3 | 1 | 3 | 3 | 3     | 1.58  |
| 5 SS—7 SC                  | 3                              | 1 | 2 | 4 | 3 | 3.23  | 1.54  |
| 5 SS—8 CR                  | 3                              | 1 | 4 | 5 | 0 | 2.85  | 1.21  |
| 5 SS—10(S                  | 4                              | 5 | 2 | 2 | 0 | 2.15  | 1.07  |
| 6 SH—7 SC                  | 3                              | 1 | 3 | 4 | 2 | 3.08  | 1.44  |
| 6 SH—8 CR                  | 4                              | 3 | 2 | 4 | 0 | 2.46  | 1.27  |
| 7 SC—8 CR                  | 3                              | 1 | 7 | 1 | 1 | 2.69  | 1.18  |

|           |   |   |   |   |   |      |      |
|-----------|---|---|---|---|---|------|------|
| 7 SC—9 D  | 5 | 4 | 3 | 1 | 0 | 2    | 1    |
| 7 SC—10 S | 4 | 2 | 5 | 2 | 0 | 1.77 | 1.12 |
| 8 CR—10 S | 3 | 4 | 5 | 0 | 1 | 2.39 | 1.12 |
| 9 D—10 S  | 5 | 3 | 3 | 2 | 0 | 2.15 | 1.14 |

## References

- [1] National health commission of the people's republic of china. Diagnosis and Treatment for COVID-19 (trial version 7). Available online: <http://www.nhc.gov.cn/xcs/zhengcwj/202003/46c9294a7dfe4cef80dc7f5912eb1989/files/ce3e6945832a438eaae415350a8ce964.pdf>(Accessed on 4 March 2020).
- [2] World Health Organization. Rolling updates on coronavirus disease (COVID-19). Available online: <https://www.who.int/emergencies/diseases/novel-coronavirus-2019/events-as-they-happen>(Accessed on 27 March 2020).
- [3] British Foreign Policy Group. COVID-2019 timeline, UK perspectives by Flora Holmes. Available online: <https://bfpgrp.co.uk/2020/04/covid-19-timeline/>(Accessed on 25 March 2020).
- [4] Van Bavel J J, Baicker K, Boggio P S, et al. Using social and behavioural science to support COVID-19 pandemic response[J]. *Nature Human Behaviour*, 2020, 1(4): 460–471.
- [5] Wilder-Smith A, Freedman D O. Isolation, quarantine, social distancing and community containment: Pivotal role for old-style public health measures in the novel coronavirus (2019-nCoV) outbreak[J]. *Journal of Travel Medicine*, 2020, 27: 1–4.
- [6] Leung K, Wu J T, Liu D, et al. First-wave COVID-19 transmissibility and severity in China outside Hubei after control measures, and second-wave scenario planning: a modelling impact assessment[J]. *The Lancet*, 2020, (395): 1382–1393.
- [7] Arenas A, Cota W, Gomez-Gardenes J, et al. Derivation of the effective reproduction number R for COVID-19 in relation to mobility restrictions and confinement. *MedRxiv*, 2020, 1-24. Available online: <https://www.medrxiv.org/content/10.1101/2020.04.06.20054320v1.full.pdf> (Accessed on 8 April 2020).
- [8] Prem K, Liu Y, Russell T W, et al. The effect of control strategies to reduce social mixing on outcomes of the COVID-19 epidemic in Wuhan, China: a modelling study. *The Lancet Public Health*, 2020, (5): 261-270.

- [9] Zhang W. Prevention and control of COVID-19[M]. Shanghai: Shanghai Scientific & Technical Publishers, 2020: 4-8.
- [10] McBride O, Murphy J, Shevlin M, et al. Monitoring the psychological impact of the COVID-19 pandemic in the general population: an overview of the context, design and conduct of the COVID-19 Psychological Research Consortium (C19PRC) Study. PsyArXiv, 2020, 1-55. Available online: <https://doi.org/10.31234/osf.io/wxe2n> (Accessed on 13 April 2020).
- [11] Salama A M. Coronavirus questions that will not go away: interrogating urban and socio-spatial implications of COVID-19 measures. Emerald Open Research 2020, 2(14). Available online: <https://doi.org/10.35241/emeraldopenres.13561.1> (Accessed on 16 April 2020).
- [12] Roy B. Problems and Methods with Multiple Objective functions[J]. Mathematical programming, 1971, 1(1): 239-266.
- [13] Goddard S T. Ranking in Tournaments and Group Decisionmaking[J]. Management science, 1983, 29(12): 1384-1392.
- [14] Saaty T L. Decision making with the analytic hierarchy process[J]. International Journal of Molecular Sciences, 2008, 1(1): 83-98.
- [15] Zadeh L A. Fuzzy logic and approximate reasoning[J]. Synthese, 1975, 30(3-4): 407-428.
- [16] Van Laarhoven P J M, Pedrycz W. A Fuzzy Extension of Saaty's Priority Theory[J]. Fuzzy sets and systems, 1983, 11(3): 229-241.
- [17] Buckley J J. Fuzzy Hierarchical Analysis[J]. Fuzzy sets and systems, 1985, 17(3): 233-247.
- [18] Zimmerman H J. Fuzzy Logic and Approximate Reasoning. Fuzzy set theory and its application (2nd ed)[M]. Boston: Kluwer Academic Publishers, 1991: 131-139.
- [19] Halliwell J, Shen Q. Linguistic probabilities: theory and application[J]. Soft Computing, 2009, (13): 169-183.
- [20] Lower M, Magott J, Skorupski J. Analysis of Air Traffic Incidents using Event Trees with Fuzzy Probabilities[J]. Fuzzy sets and systems, 2016, (293): 50-79.
- [21] Kaufmann A, Gupta M M. Introduction to fuzzy arithmetic: Theory and applications[M]. New York: VanNostrand Reinhold, 1991.
- [22] Klir G J, Yuan B. Fuzzy sets and fuzzy logic theory and applications[M]. New Jersey: Prentice-Hall International Inc, 1995: 97-117.
- [23] Delgado M, Herrera F, Herrera-Viedma E, et al. Combining numerical and linguistic information in-group decision-making[J]. Journal of information science, 1998, (107): 177-194.
- [24] World Health Organization. Coronavirus disease (COVID-19) advice for the public. Available online: <https://www.who.int/emergencies/diseases/novel-coronavirus-2019/advice-for-public> (Accessed on 29 April 2020).

- [25] Heffner J, Vives M L, FeldmanHall O. Emotional responses to prosocial messages increase willingness to self-isolate during the COVID-19 pandemic. *PsyArXiv*, 2020. Available online: <https://doi.org/10.31234/osf.io/qkxvb> (Accessed on 15 April 2020).
- [26] Center for Disease Control and Prevention. Cleaning and Disinfection for Households. Available online: <https://www.cdc.gov/coronavirus/2019-ncov/prev-ent-getting-sick/cleaning-disinfection.html> (Accessed on 26 March 2020).
- [27] Leupen B. Polyvalence, a concept for the sustainable dwelling[J]. *Nordic journal of architectural research*, 2006, 19(3): 23-31.
- [28] Rapoport A. *House form and culture*[M]. Englewood Cliffs: Prentice Hall, 1969: 46-47.
- [29] Markus H, Kitayama S. Culture and the self: implication for cognition, emotion, and motivation[J]. *Psychological Review*, 1991, (98): 224-253.
- [30] Abercrombie S. *A Philosophy Of Interior Design*[M]. London: Routledge, 1990: 4-10.
- [31] Hu X. Boundaries and openings: spatial strategies in the Chinese dwelling[J]. *Journal of Housing and the Built Environment*, 2008, 23(4): 353-366.
- [32] Don-Son W. *Constructing the Colonized Land: Entwined Perspectives of East Asia around WWII*[M]. Hampshire: Ashgate, 2014: 193-214.
- [33] Gu P, Hashemian M, Nee A Y C. Adaptable Design[J]. *CIRP Annals-Manufacturing Technology*, 2004, 53(2): 539-557.
- [34] Sand J C, Gu P. AdaptEx: extending product life cycles through strategic product upgrades[C]/*Advances in design*, 2006: 111-119.
- [35] Fletcher D, Gu P, Brennan R. Product and design adaptability quantification[C]. *Proceedings of the 16th CIRP International Design Seminar*, 2006: 432-436.
- [36] Xu Y, Chen Y, Zhang G, et al. Adaptable Design Of Machine Tools Structures[J]. *Chinese Journal of Mechanical Engineering*, 2008, 21(3): 7-15.
- [37] Gu P, Xue D, Nee. A.Y.C. Adaptable Design: Concepts, Methods and Applications[J]. *Proceedings of the Institution of Mechanical Engineers, Part B: Journal of Engineering Manufacture*, 2009, 223(11): 1367-1387.
- [38] Chen Y, Chu W, Xu Y. Adaptability-oriented parametric product platform design[J]. *Computer Integrated Manufacturing Systems*, 2007, 13(5): 877-884.
- [39] Chen Y, Man J, Qu Y, et al. Measurement method and application of adaptability for mechanical products[J]. *Chinese Journal of Engineering Design*, 2010, 17(1): 1-11.
- [40] Krueger R A, Casey M A. *Focus Groups: A Practical Guide for Applied Research*(3rd ed)[M]. Thousand Oaks: Sage Publications, 2000: 6-16.

[41] Kidd P S, Parshall M B. Getting the focus and the group: enhancing analytical rigor in focus group research[J]. Qualitative health research, 2000, 10(3): 293-308.

[42] Rabiee F. Focus-group interview and data analysis[J]. Proceedings of the Nutrition Society, 2004, 63(4): 655-660.

[43] Otto K, Wood K. A Reverse Engineering and Redesign Methodology for Product Evolution[C]. Proceeding of the 1996 ASME Design Theory and Methodology Conference, 1996, 96: 1-19.

[44] Little A, Wood K, McAdams D. Functional analysis: A fundamental empirical study for reverse engineering, benchmarking and redesign[C]. Proceeding of the 1997 Design Engineering Technical conferences, 1997: 1-21.

[45] Otto K, Wood K. Product design:Techniques in reverse engineering and new product development[M]. Beijing: Publishing house of electronics industry, 2007: 100-110.

# Fuzzy Logic based Adaptable Design and Programming of Medical Products for the COVID-19 Anti-epidemi

## ORIGINALITY REPORT

%**4**

SIMILARITY INDEX

%**3**

INTERNET SOURCES

%**3**

PUBLICATIONS

%**3**

STUDENT PAPERS

## PRIMARY SOURCES

**1**

[www.mdpi.com](http://www.mdpi.com)

Internet Source

<%**1**

**2**

Yujun Tang, Jiajia Liu, Dingyi Zhang, Zhenghao Xu, Jinjun Ji, Chengping Wen. "Cytokine Storm in COVID-19: The Current Evidence and Treatment Strategies", *Frontiers in Immunology*, 2020

Publication

<%**1**

**3**

[web.worldbank.org](http://web.worldbank.org)

Internet Source

<%**1**

**4**

Submitted to Universiti Kebangsaan Malaysia

Student Paper

<%**1**

**5**

Michał Lower, Jan Magott, Jacek Skorupski. "Analysis of Air Traffic Incidents using event trees with fuzzy probabilities", *Fuzzy Sets and Systems*, 2016

Publication

<%**1**

**6**

[www.freepatentsonline.com](http://www.freepatentsonline.com)

Internet Source

<%**1**



|                 |                                                                                                                                                                                                                                       |      |
|-----------------|---------------------------------------------------------------------------------------------------------------------------------------------------------------------------------------------------------------------------------------|------|
| 7               | Deng Yong, Liu Qi. "A TOPSIS-BASED CENTROID-INDEX RANKING METHOD OF FUZZY NUMBERS AND ITS APPLICATION IN DECISION-MAKING", Cybernetics and Systems, 2005                                                                              | <% 1 |
| Publication     |                                                                                                                                                                                                                                       |      |
| 8               | Submitted to Far Eastern University                                                                                                                                                                                                   | <% 1 |
| Student Paper   |                                                                                                                                                                                                                                       |      |
| 9               | Eingereicht an University of Malaya am 2011-06-10                                                                                                                                                                                     | <% 1 |
| Student Paper   |                                                                                                                                                                                                                                       |      |
| 10              | Submitted to University of Southampton                                                                                                                                                                                                | <% 1 |
| Student Paper   |                                                                                                                                                                                                                                       |      |
| 11              | Chan, J.W.K.. "Multi-criteria material selections and end-of-life product strategy: Grey relational analysis approach", Materials and Design, 2007                                                                                    | <% 1 |
| Publication     |                                                                                                                                                                                                                                       |      |
| 12              | <a href="http://spectrum.library.concordia.ca">spectrum.library.concordia.ca</a>                                                                                                                                                      | <% 1 |
| Internet Source |                                                                                                                                                                                                                                       |      |
| 13              | Xue, D., G. Hua, V. Mehrad, and P. Gu. "Optimal Adaptable Design Considering Changes of Requirements, Configurations and Parameters in the Whole Product Life-Cycle", Volume 1 36th Design Automation Conference Parts A and B, 2010. | <% 1 |
| Publication     |                                                                                                                                                                                                                                       |      |

14

[etds.ntut.edu.tw](https://etds.ntut.edu.tw)

Internet Source

&lt;% 1

15

Submitted to Nanyang Technological University,  
Singapore

Student Paper

&lt;% 1

16

Submitted to Athlone Institute of Technology

Student Paper

&lt;% 1

17

[emeraldopenresearch.com](https://emeraldopenresearch.com)

Internet Source

&lt;% 1

18

Studies in Fuzziness and Soft Computing, 2014.

Publication

&lt;% 1

19

Jie Qiao. "What are the risks of COVID-19  
infection in pregnant women?", The Lancet,  
2020

Publication

&lt;% 1

20

Yo Wen Liang, An Sheng Lee, Kuei-Chia Liang,  
Huang Ning Lee. "A Study on the Effect of  
Students' Imagination by Utilizing the Creative  
Methods in Industrial Design Course", EURASIA  
Journal of Mathematics, Science and  
Technology Education, 2018

Publication

&lt;% 1

21

[pt.scribd.com](https://pt.scribd.com)

Internet Source

&lt;% 1

22

Submitted to University of Central England in

Birmingham

Student Paper

<% 1

---

23

Submitted to Heriot-Watt University

Student Paper

<% 1

---

24

[openarchive.cbs.dk](http://openarchive.cbs.dk)

Internet Source

<% 1

---

25

[etheses.whiterose.ac.uk](http://etheses.whiterose.ac.uk)

Internet Source

<% 1

---

26

[qcs-qualitycompliance.netdna-ssl.com](http://qcs-qualitycompliance.netdna-ssl.com)

Internet Source

<% 1

---

27

[tandfonline.com](http://tandfonline.com)

Internet Source

<% 1

---

28

Dar-Ying Jan. "A Dynamic Decision Method Based on Triangular and Pillared Fuzzy Numbers", Lecture Notes in Computer Science, 2006

Publication

<% 1

---

29

Lecture Notes in Mechanical Engineering, 2013.

Publication

<% 1

---

30

[www.researchsquare.com](http://www.researchsquare.com)

Internet Source

<% 1

---

31

Submitted to University of Southern California

Student Paper

<% 1

---

32

Ya-nan Han, Zhan-wei Feng, Li-na Sun, Xiao-

---

xia Ren, Hua Wang, Yong-ming Xue, Yi Wang, Ying Fang. "A comparative-descriptive analysis of clinical characteristics in 2019-Coronavirus-infected children and adults", Journal of Medical Virology, 2020

Publication

---

<% 1

---

EXCLUDE QUOTES OFF

EXCLUDE MATCHES OFF

EXCLUDE  
BIBLIOGRAPHY ON
